# Supplementary material for: Incident type 2 diabetes and hip fracture risk: a population-based matched cohort study
Source: Springer Nature journal article supplement (doi:10.1007/s00198-014-2986-9), 2014-12-08
Supplement: MOESM2 [file 8160310]

Appendix 2: main drugs analyzed and ATC codes

| Drug | ATC code |
| --- | --- |
| Bisphosphonates | M05BA01, M05BA02, M05BA04, M05BA05, M05BA06, M05BA07 and M05BB03 |
| Strontium ranelate | M05BX03 |
| PTH | H05AA02 and H05AA03 |
| Selective estrogen receptor modulator | G03XC01 |
| Thiazidic diuretics (alone or in combination) | C03AA03, C07BB02, C07BB03, C07BB07, C07CA02, C07CB03, C07DB01, C09BA01, C09BA02, C09BA03, C09BA04, C09BA05, C09BA06, C09BA07, C09BA08, C09BA09, C09DA01, C09DA03, C09DA04 and C09DA06 |
| Oral corticoids | H02AB01,H02AB02, H02AB04, H02AB05, H02AB06, H02AB07, H02AB08, H02AB09 and H02AB13 |
| Insulin | A10AB01, A10AB04, A10AB05, A10AB06, A10AC01, A10AC04, A10AD01, A10AD04, A10AD05, A10AE04 and A10AE05 |
| Metformin | A10BA02 |
| Sulphonylureas | A10BB01, A10BB02, A10BB07, A10BB08, A10BB09, A10BB12 and A10BB91 |
| Thiazolidinediones (alone or in combination) | A10BD03, A10BD04, A10BD05, A10BG02 and A10BG03 |
